# Supplementary material for: Fear of Cancer Recurrence Inventory Validation in Hindi: Phase I
Source: Research Square preprint supplement (doi:10.21203/rs.3.rs-7149326/v1), 2025-09-05
Supplement: Supplementary file 1 [file 01a80e83e97bc8b05e8be134.docx]

**Fear of Cancer Recurrence Inventory Validation in Hindi: Phase I**

Kamna Yadav*, S.P.K. Jena**, Amit Agarwal***

*****Assistant Professor, O. P. Jindal Global University, Jindal School of Psychology & Counselling, Sonipat, Haryana, India (kamna.yadav@jgu.edu.in)

**Professor, Department of Applied Psychology, South Campus, University of Delhi, India

***Medical Oncologist, Delhi, India

*Corresponding Author:

Kamna Yadav

[kamna.yadav@jgu.edu.in](mailto:kamna.yadav@jgu.edu.in)

**Online Resource 2: Cross-Cultural Validation**

**Table 1.** Socio-demographic details.

| **Characteristics** | **Description** | **Study Group** |
| --- | --- | --- |
| **Frequency (%)** |
| Gender | Male | 34 |
| Female | 66 |
| Education | 12th std | 07 |
| Graduation | 62 |
| Post-Graduation | 28 |
| PhD | 03 |
| Occupation | Business | 14 |
| Homemaker | 31 |
| Service | 30 |
| Retired | 25 |
| Marital Status | Single | 10 |
| Married | 86 |
| Widow | 04 |
| Socio-economic Status | USES | 04 |
| UMSES | 23 |
| MSES | 71 |
| LSES | 02 |
| Family Type | Joint | 44 |
| Nuclear | 56 |
| Domicile | Urban | 99 |
| Rural | 01 |
| Religion | Hindu | 89 |
| Sikh | 06 |
| Christian/Muslim | 05 |

Note: USES: Upper socio-economic status, UMSES: Upper middle socio-economic status, MSES: Middle socio-economic status, LSES: Lower socio-economic status.

Majority of cancer patients were females (66%), married (86%), Hindu by religion (89%), graduated (62%), homemaker (31%), belonging to middle socio-economic status (71%), hailing from urban background (99%) and living in nuclear family (56%).

**Table 2.** Clinical characteristics of participants.

| **Variable** | **Min.** | **Max.** | **Mean** | **S.D.** |
| --- | --- | --- | --- | --- |
| Age | 23 | 82 | 56.31 | 12.85 |
| Age of Onset | 23 | 80 | 54.07 | 12.84 |
| Duration of Illness | 01 | 09 | 04.14 | 01.58 |
| Stage | 01 | 04 | 02.72 | 00.79 |
| Chemotherapy Cycle | 01 | 17 | 07.66 | 07.17 |

Mean age of participants was 56.31±12.85, age of onset 54.04±12.84, duration of illness 4.14±1.58, mean stage 2.72±0.79 and chemotherapy cycle 7.66±7.17, respectively in a sample of 100 cancer patients.

**Table 3.** Exploratory Factor Analysis.

| **Kaiser-Meyer-Olkin Measures of Sampling Adequacy** | **.84** | |
| --- | --- | --- |
| Bartlett’s test of sphericity | Chi-Square | 1086.000 |
| df | 120.000 |
| p | .000 |

**Table 4.** Extraction Sums of loading.

| **Extraction Sums of Squared Loadings** | | | **Rotation Sums of Squared Loadings** | | |
| --- | --- | --- | --- | --- | --- |
| Total | Percentage of variance | Cumulative Percentage | Total | Percentage of variance | Cumulative Percentage |
| 8.17 | 51.06 | 51.06 | 4.45 | 27.84 | 27.84 |
| 1.25 | 7.82 | 58.88 | 3.91 | 24.48 | 52.33 |
| 1.17 | 7.32 | 66.20 | 2.22 | 13.87 | 66.20 |

Using total variance explained, seven original factors can be reduced to 3 underlying components, explaining 51% variance in the data. (Refer Table 4). None of the sub-scales and items were removed as minimum criteria of having a primary factor loading (0.04 or above) was met. Solution for all components were examined using Orthogonal rotation.
