# Supplementary material for: Fear of Cancer Recurrence Inventory Validation in Hindi: Phase I
Source: Research Square preprint supplement (doi:10.21203/rs.3.rs-7149326/v1), 2025-09-05
Supplement: Supplementary file 2 [file 656a2594c386f399aa0be9bf.docx]

**Fear of Cancer Recurrence Inventory Validation in Hindi: Phase I**

Kamna Yadav*, S.P.K. Jena**, Amit Agarwal***

*****Assistant Professor, O. P. Jindal Global University, Jindal School of Psychology & Counselling, Sonipat, Haryana, India (kamna.yadav@jgu.edu.in)

**Professor, Department of Applied Psychology, South Campus, University of Delhi, India

***Medical Oncologist, Delhi, India

Corresponding Author:

Kamna Yadav

[kamna.yadav@jgu.edu.in](mailto:kamna.yadav@jgu.edu.in)

**Online Resource 1: *Pilot Testing***

**Table 1**. Socio-Demographic Details

| **Characteristics** | **Description** | **Study Group** | |
| --- | --- | --- | --- |
| **%** | **Frequency** |
| Gender | Male | 43.3 | 13 |
| Female | 56.7 | 17 |
| Education | Graduation | 53.3 | 16 |
| Post-Graduation | 43.3 | 13 |
| PhD | 3.3 | 01 |
| Occupation | Business | 14.3 | 04 |
| Homemaker | 26.7 | 08 |
| Service | 36.7 | 11 |
| Retired | 23.3 | 07 |
| Marital Status | Single | 10.0 | 03 |
| Married | 76.7 | 23 |
| Widow | 13.3 | 04 |
| Socio-economic Status | USES | 16.7 | 05 |
| UMSES | 10.0 | 03 |
| MSES | 63.3 | 19 |
| LSES | 10.0 | 03 |
| Family Type | Joint | 53.3 | 16 |
| Nuclear | 46.7 | 14 |
| Domicile | Urban | 96.7 | 29 |
| Rural | 3.3 | 01 |
| Religion | Hindu | 24 | 80.0 |
| Sikh | 04 | 13.2 |
| Christian | 0  2 | 6.7 |

Thirty heterogenous cancer patients participated in the pilot-study (Refer Table 1), majority of them being females (56.7%), graduate (53.3 %), married (76.6%), employed (36.7%), Hindu by religion (80%), belonging to middle socio-economic status (63.3%) and living in joint family (53.3%) and hailing from urban area (96.7%).

**Table 2.** Age of Onset & duration of illness.

| **Variable** | **Mean** | **S.D.** |
| --- | --- | --- |
| Age | 55.03 | 11.52 |
| Age of Onset | 53.33 | 11.00 |
| Duration of Illness | 11.08 | 03.00 |
| Stage | 03 | 00.90 |
| Chemotherapy Cycle | 05.36 | 04.21 |

The mean age of patients was 55 years (range: 26-74), mean age of onset was 53.3 (range: 25-73), mean duration illness was 11.8 months (range: 1-48). The table also shows stage III (range: I-IV) as a mean stage, out of which 5.4 (range: 1-16) weeks was mean chemotherapy cycle (Refer Table 2).

**Table 3.** Characteristics of participants.

| **Variable** | | **%** | **Frequency** |
| --- | --- | --- | --- |
| Diagnosis | Breast Carcinoma | 30 | 09 |
| Lung Carcinoma | 26.7 | 08 |
| Ovary Carcinoma | 13.3 | 04 |
| Colon Carcinoma | 13.3 | 04 |
| Surgery | Yes | 40 | 12 |
| No | 60 | 18 |
| Recurrence | Yes | 30 | 09 |
| No | 70 | 21 |

Breast cancer diagnosis (30%) was in majority with majority of them had not undergone surgery (60%), 70% did not have recurrent episode. All the patients were undergoing chemotherapy.

**Table 4.** Facets of Interview.

| **Facets/Domain** | | **%** | **Frequency** |
| --- | --- | --- | --- |
| Easy to answer | Great Extent | 70 | 21 |
| A Lot | 30 | 09 |
| Easy to understand | Great Extent | 76.7 | 23 |
| A Lot | 23.3 | 07 |
| Confusing | Not at all | 93.3 | 28 |
| A Little | 6.7 | 02 |
| Upsetting/Offensive | Not at all | 80 | 24 |
| A Little | 20 | 06 |
| Rephrase | Not at all | 100 | 30 |
| A Little | 00 | 00 |

The majority of patients reported questionnaire was easy to answer (70%), easy-to-understand (76.7%), not at all confusing (93.3%), upsetting/offensive (80%), and no need to rephrase (100%).
